# Supplementary material for: How much genetic variation is stored in the endangered and fragmented shrub Tetraena mongolica Maxim?
Source: PeerJ. 2018 Sep 21;6:e5645. doi: 10.7717/peerj.5645 (PMC6152454; doi:10.7717/peerj.5645)
Supplement: Supplemental Information 1 [file peerj-06-5645-s001.xlsx]

## Sheet: Sheet1
	Tm126-T		Tm184-H		Tm12-F		Tm21-T		Tm46-H		Tm18-F		Tm60-T		Tm32-H		Tm137-F		Tm221-T		Tm192-T		Tm228-F
SZS-1	292	296	262	262	0	0	344	344	286	294	0	0	382	386	270	270	146	152	302	308	248	262	158	158
SZS-2	292	292	0	0	0	0	342	362	284	306	0	0	380	386	270	270	152	176	296	318	250	256	158	178
SZS-3	286	292	0	0	0	0	344	356	282	294	262	282	386	390	278	282	146	146	300	308	232	236	158	158
SZS-4	286	292	0	0	0	0	362	372	282	300	262	274	380	388	280	296	146	168	326	344	234	244	152	158
SZS-5	292	296	0	0	0	0	362	362	282	294	262	272	380	388	276	276	152	178	296	320	246	254	152	158
SZS-6	288	292	258	262	0	0	344	362	282	290	262	270	386	390	272	272	178	186	304	318	240	248	152	158
SZS-7	288	292	258	262	0	0	334	344	282	290	270	270	376	378	272	272	178	186	292	304	240	248	152	160
SZS-8	286	292	0	0	0	0	344	358	282	284	270	286	386	390	280	302	152	164	318	336	234	240	152	160
SZS-9	292	296	0	0	0	0	344	366	282	286	272	284	388	390	276	280	152	152	308	314	248	252	158	184
SZS-10	0	0	0	0	0	0	0	0	298	300	0	0	0	0	282	282	146	152	0	0	0	0	180	184
SZS-11	288	298	248	262	184	202	344	362	290	306	272	278	388	390	278	282	176	176	304	342	256	260	158	168
SZS-12	294	294	0	0	0	0	0	0	282	288	282	288	380	390	0	0	182	182	0	0	246	256	152	160
SZS-13	286	292	266	266	184	196	334	344	282	286	272	278	380	388	270	274	0	0	310	314	232	244	158	182
SZS-14	286	298	250	256	0	0	344	356	282	286	276	278	380	390	272	280	182	182	318	324	238	262	158	162
SZS-15	286	298	250	256	0	0	344	362	282	286	276	278	380	390	274	280	182	182	318	324	238	262	158	162
SZS-16	286	298	0	0	184	196	334	344	282	296	278	284	386	392	0	0	176	178	302	304	234	252	158	162
SZS-17	286	292	256	258	184	186	334	356	306	324	270	278	376	380	280	288	172	172	308	342	240	258	158	162
SZS-18	294	294	258	258	186	200	344	362	292	294	276	280	378	390	272	280	180	190	308	326	244	258	170	182
SZS-19	292	292	260	260	0	0	344	358	282	288	260	286	386	390	278	278	0	0	326	334	244	248	184	188
SZS-20	288	296	250	250	184	194	344	358	282	298	270	270	380	388	280	302	174	174	344	362	252	256	146	158
SZS-21	292	300	256	262	184	202	344	374	298	310	270	286	386	390	272	272	146	146	336	342	232	248	152	158
SZS-22	292	296	252	266	184	198	352	360	282	290	270	280	386	390	274	274	146	146	324	344	256	260	158	162
SZS-23	278	292	262	262	0	0	362	374	274	296	278	286	378	386	280	294	146	152	330	344	232	240	158	162
SZS-24	292	296	248	248	196	206	326	368	282	298	278	290	386	390	276	276	178	184	314	316	242	244	158	158
SZS-25	286	292	0	0	174	184	334	344	282	290	272	278	380	388	274	280	176	176	340	346	240	258	152	158
SZS-26	286	292	0	0	174	184	334	344	272	282	276	286	380	386	276	280	172	176	336	346	240	248	154	158
SZS-27	0	0	0	0	184	196	334	344	282	296	270	278	386	390	270	278	146	152	322	326	232	238	158	158
SZS-28	292	296	258	258	184	184	362	366	282	288	270	278	380	386	274	280	178	178	346	352	232	248	154	158
SZS-29	292	292	268	276	0	0	344	358	282	290	270	278	390	392	278	284	146	146	0	0	244	248	158	162
SZS-30	286	292	0	0	192	196	344	362	282	288	272	278	380	386	276	296	146	146	326	352	250	256	158	162
SZS-31	288	296	0	0	198	210	354	362	282	296	278	296	380	388	272	280	148	152	316	336	254	258	152	158
SZS-32	286	296	0	0	0	0	344	372	282	298	272	278	380	392	272	280	146	152	320	320	232	250	152	158
DS-1	292	298	230	230	186	202	360	366	282	282	280	284	380	388	272	278	146	150	314	322	244	252	188	210
DS-2	292	296	0	0	186	202	340	340	284	290	288	290	390	390	276	280	184	184	318	328	254	258	174	180
DS-3	286	292	254	254	192	222	344	362	282	294	282	290	380	388	276	280	146	150	304	332	240	254	158	162
DS-4	288	296	0	0	184	196	344	368	282	294	262	278	386	390	266	272	146	146	0	0	256	258	152	158
DS-5	292	292	258	266	196	222	344	360	282	308	288	290	390	392	272	278	172	176	0	0	232	240	158	174
DS-6	286	292	0	0	184	202	354	364	290	296	274	288	388	388	274	284	146	146	0	0	240	254	158	162
DS-7	294	294	230	258	184	196	344	368	282	282	264	280	388	392	296	300	146	150	308	330	232	244	162	174
DS-8	286	292	0	0	202	222	344	362	282	298	282	290	386	388	272	276	182	182	328	344	244	254	198	210
DS-9	296	300	272	272	184	196	340	358	282	298	278	284	380	388	266	282	146	150	0	0	232	244	178	196
DS-10	0	0	0	0	196	196	0	0	280	290	0	0	0	0	0	0	146	174	0	0	0	0	158	186
DS-11	286	292	0	0	184	196	340	366	282	290	288	290	376	380	284	300	146	152	314	326	248	262	158	174
DS-12	286	292	258	258	184	200	344	364	282	298	276	286	388	390	276	278	146	152	318	318	242	246	152	158
DS-13	288	292	0	0	184	202	364	364	282	298	264	300	388	392	300	302	174	174	0	0	252	258	158	174
DS-14	288	292	262	262	186	200	344	362	294	308	270	296	388	388	284	292	146	150	0	0	252	252	176	184
DS-15	286	292	258	258	196	202	344	366	290	304	290	290	388	390	292	312	176	182	0	0	254	258	152	158
DS-16	288	292	0	0	184	196	364	364	282	286	264	278	380	390	288	300	184	184	302	342	254	258	158	158
DS-17	286	292	0	0	192	206	344	360	292	298	282	288	388	394	266	272	182	182	0	0	232	254	152	158
DS-18	292	296	258	258	184	196	352	360	282	290	278	288	390	390	280	284	146	146	304	328	252	254	162	174
DS-19	290	298	0	0	184	196	356	362	300	308	264	282	388	390	276	276	146	146	300	342	240	254	152	174
DS-20	292	296	250	250	196	224	360	362	282	296	278	284	390	392	276	280	178	182	314	320	240	250	162	172
DS-21	292	296	250	250	186	224	360	362	282	296	278	284	390	392	272	278	178	182	320	352	250	254	174	174
DS-22	284	292	230	260	186	200	364	368	294	298	264	286	388	388	284	296	146	152	316	318	246	258	174	182
DS-23	292	296	0	0	196	204	360	372	282	290	278	288	388	394	276	280	176	176	326	326	252	270	176	198
DS-24	286	292	250	250	186	192	364	368	282	282	282	290	374	378	276	298	146	150	0	0	256	258	188	192
DS-25	288	292	244	244	184	196	366	380	282	290	278	290	388	390	266	272	146	150	314	326	244	258	174	210
DS-26	292	296	270	270	186	202	340	358	290	298	278	288	380	388	276	276	184	184	302	304	254	258	178	178
DS-27	300	300	266	270	184	206	354	362	282	290	266	286	388	390	276	280	172	172	300	314	240	244	184	210
DS-28	292	296	258	258	186	196	360	368	282	294	278	284	388	390	278	284	180	180	310	318	252	254	174	182
DS-29	288	292	230	266	184	192	354	368	280	296	276	294	380	388	278	284	146	152	314	324	240	242	188	198
DS-30	286	292	0	0	184	192	366	366	294	306	276	280	380	388	272	278	184	184	0	0	252	260	188	188
DS-31	286	292	258	258	202	222	362	372	300	308	290	296	380	388	294	300	146	150	322	340	230	256	158	158
DS-32	290	296	266	266	196	202	344	356	288	294	290	296	386	390	294	312	174	182	320	330	256	262	158	162
DS-33	294	300	0	0	186	192	362	366	282	294	262	280	390	394	274	276	146	150	0	0	232	244	158	174
DS-34	292	296	256	264	184	188	362	368	282	290	282	282	380	390	276	288	150	158	316	322	246	250	158	166
DS-35	0	0	0	0	184	188	0	0	0	0	0	0	0	0	0	0	166	172	0	0	0	0	0	0
DS-36	286	292	230	262	184	202	342	350	288	298	270	270	386	388	262	272	178	178	328	338	250	260	152	158
DS-37	292	294	252	258	188	208	356	362	282	296	270	282	388	390	272	274	172	172	314	316	240	248	182	188
DS-38	288	296	262	262	184	208	356	360	294	298	280	286	386	392	298	308	178	178	324	330	246	248	188	196
DS-39	296	300	246	246	198	218	366	372	300	300	276	286	380	388	272	278	174	182	328	340	248	254	152	158
DS-40	292	296	0	0	0	0	360	366	282	292	282	286	386	388	298	300	192	192	304	334	246	262	158	158
DS-41	292	296	270	278	184	186	372	376	296	302	276	284	390	390	278	278	184	184	318	336	254	256	158	158
DS-42	292	296	250	262	184	202	342	342	288	292	276	282	380	388	268	270	162	178	314	334	250	260	152	158
DS-43	292	296	232	232	186	196	342	342	296	304	274	286	390	392	276	278	170	172	326	328	254	258	158	162
DS-44	292	300	250	252	186	202	356	374	282	300	272	276	388	392	278	278	176	176	324	334	236	254	158	158
DS-45	292	296	0	0	184	188	358	358	288	292	278	286	376	380	276	286	172	180	330	340	246	256	152	160
DS-46	292	296	0	0	0	0	368	376	282	286	278	282	386	388	294	296	146	152	326	352	254	256	188	192
DS-47	286	292	258	258	184	198	360	362	286	294	274	278	380	390	276	278	174	192	304	328	240	260	158	158
DS-48	296	300	0	0	184	198	374	374	288	298	274	276	376	380	272	276	176	176	320	322	244	258	158	164
DS-49	282	290	250	250	184	186	362	368	284	290	284	290	386	388	276	278	180	180	322	328	248	270	152	158
DS-50	282	298	0	0	184	198	364	370	292	302	276	280	388	390	288	294	146	146	314	322	260	266	158	168
DS-51	292	296	0	0	184	196	358	366	288	292	276	282	388	390	276	288	184	192	314	338	238	240	182	184
DS-52	292	296	0	0	184	186	360	370	292	308	260	280	388	390	298	298	184	192	314	316	234	242	182	184
DS-53	286	296	258	264	0	0	376	376	288	298	278	284	376	380	298	300	184	184	0	0	254	262	180	188
DS-54	292	294	252	252	0	0	356	376	298	312	276	284	388	390	280	288	182	192	298	304	250	268	152	170
DS-55	276	292	0	0	0	0	362	372	298	304	276	280	386	390	308	310	146	152	314	332	246	250	176	176
DS-56	288	292	0	0	174	184	364	364	296	312	270	270	380	388	300	300	146	158	332	336	238	240	182	184
DS-57	274	296	0	0	184	192	362	362	294	312	274	286	390	390	270	270	146	146	318	328	252	256	162	172
DS-58	286	292	248	256	184	188	358	358	288	292	280	280	388	390	318	320	170	182	322	326	246	266	188	192
DS-59	288	296	254	260	0	0	358	358	284	292	274	290	378	390	292	292	174	174	316	316	250	262	162	168
DS-60	292	296	256	262	184	192	364	376	290	292	276	286	386	388	290	298	196	196	318	322	244	254	152	158
DS-61	286	292	262	264	184	180	380	380	292	304	274	300	376	380	280	284	146	146	318	336	254	260	174	188
DS-62	0	0	0	0	174	184	0	0	282	298	0	0	0	0	0	0	146	150	0	0	0	0	178	182
DS-63	278	292	256	256	0	0	360	374	298	302	260	280	388	390	298	300	146	150	318	318	236	260	170	180
DS-64	294	298	252	252	184	196	352	368	282	294	270	280	380	386	272	280	182	192	318	338	260	266	152	158
HN-1	286	292	260	260	184	204	392	394	282	308	262	296	386	392	272	280	146	150	314	324	260	268	158	158
HN-2	286	292	258	260	184	208	362	374	298	300	276	288	386	388	276	284	174	174	314	322	258	268	158	162
HN-3	286	298	0	0	184	192	344	360	282	298	284	290	386	390	276	278	182	182	308	346	256	268	152	158
HN-4	288	298	0	0	202	212	356	372	290	294	282	288	380	394	274	280	174	182	322	332	256	268	188	190
HN-5	286	292	0	0	184	206	356	356	284	290	278	292	386	392	272	282	198	198	324	328	246	268	172	188
HN-6	292	296	260	260	186	200	344	354	304	312	280	286	376	380	278	280	170	178	334	346	240	244	158	162
HN-7	292	296	244	244	186	214	344	368	282	292	274	280	376	380	276	280	146	152	324	356	260	266	158	162
HN-8	300	304	0	0	186	216	362	366	282	288	286	298	386	388	274	284	146	152	308	314	252	258	152	158
HN-9	292	296	0	0	210	216	356	366	304	316	274	280	380	388	274	276	146	146	298	332	248	256	158	158
HN-10	284	298	246	246	188	200	356	362	282	288	286	288	390	390	274	278	178	178	322	362	240	256	152	158
HN-11	286	292	258	258	186	192	344	344	290	298	274	296	376	380	276	288	160	160	314	318	232	278	158	162
HN-12	292	298	228	228	192	204	360	376	300	316	274	284	386	390	278	288	174	174	318	320	260	264	182	182
HN-13	286	294	260	260	184	196	362	386	282	292	274	286	388	390	270	286	168	168	298	312	246	250	184	188
HN-14	292	296	262	262	196	206	354	360	282	302	276	280	390	392	278	278	178	178	302	332	260	268	174	174
HN-15	286	292	258	258	186	200	344	356	290	298	272	272	388	388	272	276	160	182	320	336	240	244	158	162
HN-16	286	292	252	252	186	196	362	366	282	300	274	278	388	396	276	296	174	178	298	314	248	256	174	174
HN-17	292	298	0	0	0	0	362	362	282	298	0	0	380	388	276	276	176	176	314	314	236	242	158	160
HN-18	288	292	0	0	0	0	360	366	292	308	266	290	390	392	276	280	162	170	322	362	252	262	158	158
HN-19	292	300	260	260	184	214	360	368	276	282	270	280	380	388	280	282	146	152	322	354	266	268	152	156
HN-20	292	296	0	0	0	0	0	0	290	298	0	0	390	392	0	0	188	188	0	0	232	268	180	180
HN-21	290	298	248	262	186	204	344	360	282	288	278	298	376	380	270	276	176	184	308	322	240	248	158	162
HN-22	0	0	0	0	0	0	0	0	0	0	0	0	0	0	0	0	150	150	0	0	0	0	158	158
HN-23	292	298	258	268	184	192	362	376	278	282	278	286	380	388	272	280	176	190	328	338	258	262	158	162
HN-24	284	300	228	228	190	190	362	374	282	284	276	282	388	390	276	280	176	176	314	352	250	252	152	158
HN-25	300	306	0	0	196	216	344	344	282	298	286	288	390	392	272	280	174	178	338	346	250	252	158	162
HN-26	292	292	0	0	200	208	0	0	282	282	274	282	376	380	272	276	160	168	326	356	254	258	172	190
HN-27	300	300	0	0	206	206	368	372	288	292	280	284	376	380	270	274	160	192	326	326	262	272	158	166
HN-28	296	296	0	0	0	0	344	364	286	308	0	0	388	390	280	284	172	172	316	316	232	236	158	158
HN-29	298	298	260	260	196	202	344	376	282	298	272	280	388	392	272	274	172	174	314	322	232	238	158	158
HN-30	0	0	0	0	0	0	0	0	0	0	0	0	0	0	0	0	146	150	0	0	0	0	154	178
HN-31	292	296	244	266	196	200	368	368	282	298	272	282	388	390	272	276	146	152	356	356	244	250	174	188
HN-32	286	296	0	0	192	192	342	354	282	290	268	272	378	388	272	278	180	180	318	324	246	256	152	158
HN-33	284	292	250	260	200	212	360	368	282	292	264	292	380	390	276	280	178	178	344	348	234	244	152	158
HN-34	294	300	248	258	0	0	368	372	294	310	272	284	386	392	278	282	146	146	314	328	246	250	152	158
HN-35	288	292	266	266	196	204	344	256	286	290	274	280	380	390	290	298	172	176	330	344	248	252	172	184
HN-36	288	292	256	260	194	218	344	256	290	306	276	294	380	388	276	280	180	180	312	324	240	250	152	156
HN-37	292	296	260	260	208	212	360	268	282	294	264	284	380	390	272	276	146	152	348	366	252	256	152	158
HN-38	292	296	262	262	194	204	350	362	282	294	276	282	380	388	272	280	174	174	304	308	258	266	158	158
HN-39	282	292	260	260	174	184	358	368	282	290	282	290	386	390	272	280	146	150	316	344	232	246	162	188
HN-40	282	292	256	256	170	184	354	356	282	300	0	0	390	396	286	288	172	180	312	314	250	252	152	158
HN-41	272	298	266	266	0	0	362	368	296	308	268	274	380	386	0	0	180	180	304	314	242	258	170	174
HN-42	292	294	248	248	186	188	366	366	282	288	274	274	388	390	276	278	174	174	298	302	248	250	158	172
HN-43	274	292	256	256	0	0	362	366	288	314	0	0	388	390	0	0	178	178	302	306	248	256	158	158
HN-44	274	294	260	260	184	188	364	366	0	0	0	0	0	0	0	0	172	176	324	328	254	256	164	174
HN-45	286	292	248	260	184	186	354	354	292	300	0	0	386	388	278	288	178	178	324	324	254	272	172	174
HN-46	288	294	0	0	0	0	358	362	282	286	0	0	380	388	280	280	176	180	330	348	252	256	158	174
HN-47	282	292	0	0	0	0	354	374	298	304	0	0	388	390	272	272	170	170	298	310	246	256	158	170
HN-48	278	286	0	0	174	184	342	362	312	314	274	282	390	392	272	272	172	190	322	326	240	256	170	174
HN-49	282	292	0	0	0	0	344	354	298	304	0	0	390	392	272	272	142	142	308	316	236	246	158	162
HN-50	280	282	0	0	0	0	0	0	282	294	282	282	0	0	0	0	176	176	304	314	244	256	152	152
HN-51	282	292	250	266	184	186	354	356	282	288	274	274	376	380	290	290	146	146	314	314	244	246	158	164
DALS-1	300	300	264	264	0	0	356	362	282	290	272	278	388	390	262	276	174	176	308	320	242	252	158	158
DALS-2	292	296	270	270	204	204	342	352	290	300	276	284	388	390	278	282	174	180	328	330	256	262	152	178
DALS-3	0	0	0	0	0	0	0	0	282	296	0	0	0	0	0	0	172	172	0	0	242	262	158	178
DALS-4	292	298	254	254	200	210	360	372	284	308	274	274	380	388	272	272	174	180	314	334	232	244	152	156
DALS-5	280	292	292	292	200	204	356	362	282	288	262	280	380	388	270	278	178	178	320	352	250	266	158	160
DALS-6	296	300	0	0	196	200	362	264	298	314	278	286	380	390	276	278	152	152	318	350	250	268	158	158
DALS-7	292	300	0	0	196	200	366	372	290	298	276	280	380	388	272	274	146	150	310	314	240	260	152	158
DALS-8	0	0	0	0	0	0	0	0	0	0	0	0	0	0	0	0	148	148	0	0	0	0	152	160
DALS-9	288	292	260	260	208	216	344	366	282	288	266	272	374	378	272	274	172	184	328	330	250	252	152	158
DALS-10	300	304	262	262	0	0	342	356	298	304	274	278	380	386	278	278	178	178	346	358	232	240	158	158
DALS-11	0	0	0	0	0	0	0	0	290	292	0	0	0	0	0	0	190	190	0	0	246	246	158	158
DALS-12	280	294	0	0	196	210	364	368	296	300	274	280	380	390	276	278	144	150	318	336	232	240	158	162
DALS-13	292	292	0	0	192	200	342	364	274	298	278	282	388	392	280	286	176	176	312	322	240	254	152	158
DALS-14	292	296	230	230	0	0	362	380	288	294	270	284	384	388	272	272	150	150	318	330	256	260	156	162
DALS-15	288	292	230	292	184	198	358	358	282	288	272	284	380	388	272	278	172	172	322	326	256	264	158	162
DALS-16	0	0	0	0	0	0	338	338	0	0	0	0	0	0	274	274	0	0	0	0	0	0	156	160
DALS-17	292	292	0	0	0	0	360	366	296	300	0	0	380	390	274	274	172	184	0	0	252	260	172	172
DALS-18	296	296	0	0	0	0	356	362	294	304	278	278	380	386	272	278	142	146	318	324	260	262	158	160
DALS-19	0	0	0	0	0	0	0	0	292	296	0	0	0	0	270	274	146	172	0	0	240	250	158	158
DALS-20	294	294	250	250	0	0	364	366	292	300	274	274	386	390	270	274	146	172	310	320	240	250	158	158
DALS-21	292	296	260	260	184	206	364	366	288	294	274	280	376	380	280	286	178	176	320	326	260	272	152	158
DALS-22	286	292	0	0	0	0	356	372	282	288	260	284	386	388	280	280	176	176	322	324	242	280	152	158
DALS-23	294	296	266	266	194	206	342	356	282	298	276	284	380	390	270	278	142	146	308	346	240	256	152	158
DALS-24	288	300	264	264	186	204	342	358	282	288	276	288	376	380	272	278	176	172	308	318	240	246	152	158
DALS-25	294	298	0	0	186	196	360	364	286	296	278	278	386	390	272	276	180	180	320	330	248	252	158	158
DALS-26	286	292	256	260	192	206	342	356	292	310	274	276	386	388	272	278	176	180	318	322	250	256	158	158
DALS-27	292	294	260	262	184	196	342	362	282	294	276	284	380	392	268	278	184	186	308	320	240	246	158	160
DALS-28	292	296	0	0	184	200	356	360	298	300	276	278	380	392	280	280	146	150	320	320	266	268	158	158
DALS-29	288	298	262	262	186	202	362	366	296	308	262	274	374	378	276	282	146	150	314	322	252	266	156	158
DALS-30	280	284	260	260	188	188	364	376	300	310	280	294	380	390	270	272	146	152	318	318	250	254	158	162
DALS-31	280	288	0	0	186	198	362	366	282	288	266	272	376	380	270	270	146	172	308	328	254	260	152	158
DALS-32	292	294	256	256	184	196	374	380	282	290	274	282	386	390	278	288	146	146	314	322	264	266	174	188
DALS-33	292	296	256	256	186	196	364	366	300	312	280	282	386	388	270	270	146	152	314	332	242	246	158	160
DALS-34	288	292	260	260	186	196	342	356	290	310	274	286	390	392	278	278	146	146	318	336	244	250	170	174
DALS-35	292	296	268	268	186	200	372	390	300	310	266	272	380	390	270	280	188	188	338	346	232	240	152	158
DALS-36	292	298	256	256	196	202	360	394	304	310	262	280	386	390	278	280	150	172	312	324	250	256	158	160
DALS-37	292	294	256	256	196	206	360	378	282	290	280	288	380	386	278	280	146	146	314	320	254	262	152	160
DALS-38	292	294	258	258	186	192	360	378	282	286	274	276	388	390	268	278	180	188	314	320	256	264	152	158
DALS-39	284	296	252	256	186	196	356	372	298	300	274	276	374	378	270	278	174	174	336	338	240	244	158	162
DALS-40	302	304	252	256	196	200	388	388	290	304	266	270	388	392	288	290	178	180	318	324	250	260	158	160
DALS-41	292	294	0	0	184	196	360	360	290	306	292	292	388	388	0	0	176	182	0	0	0	0	160	162
DALS-42	282	292	256	256	186	196	360	366	290	296	264	278	388	390	272	280	172	186	314	324	242	244	160	172
DALS-43	288	294	254	254	190	200	368	368	290	296	276	278	388	392	270	278	178	188	302	314	250	254	152	162
DALS-44	286	292	250	250	196	210	364	366	282	290	276	286	380	386	278	280	186	186	342	346	254	264	152	162
DALS-45	286	296	268	268	184	196	362	382	290	296	266	298	380	388	278	284	172	176	290	390	244	248	158	160
DALS-46	286	294	252	252	184	188	354	356	298	300	276	280	388	390	280	280	170	178	318	324	252	254	174	174
DALS-47	294	300	252	252	196	200	360	360	288	292	270	274	388	390	272	278	182	182	320	324	232	240	158	158
DALS-48	292	294	268	268	184	196	360	378	290	314	276	280	378	388	278	288	172	180	318	320	244	256	158	160
DALS-49	288	292	0	0	192	196	362	388	290	296	268	276	388	388	280	282	176	180	318	342	244	248	152	158
DALS-50	288	292	0	0	198	198	360	360	282	290	278	278	388	390	278	288	180	188	300	320	250	256	160	160
DALS-51	292	296	268	268	184	196	360	372	282	290	268	280	376	380	278	280	180	180	320	326	250	256	158	160
DALS-52	300	302	250	250	182	186	366	378	282	286	270	280	374	380	278	280	186	186	318	346	242	256	152	158
DALS-53	292	292	0	0	184	186	360	364	290	296	282	290	376	380	268	278	166	180	314	322	244	248	160	184
DALS-54	292	296	268	268	184	196	360	388	280	288	266	274	376	380	270	278	176	176	328	342	240	244	158	160
DALS-55	288	292	256	256	184	196	360	362	282	296	278	280	386	388	270	278	0	0	318	338	244	244	152	160
DALS-56	300	304	230	230	196	204	360	364	290	306	276	280	388	390	270	278	150	152	316	320	250	254	152	160
DALS-57	292	296	292	292	184	196	360	388	296	308	284	294	380	388	276	280	176	176	340	346	250	256	152	158
DALS-58	286	292	292	292	196	200	342	360	290	300	270	280	388	394	272	280	178	182	320	324	250	256	160	164
DALS-59	292	296	244	244	184	196	342	360	282	290	274	276	380	386	278	284	180	180	302	320	244	248	158	162
DALS-60	296	300	252	260	196	196	342	386	290	290	276	276	376	380	270	270	178	180	318	318	250	258	152	158
DALS-61	292	294	292	292	184	196	364	378	290	296	262	276	388	390	280	280	180	186	314	324	244	250	152	158
DALS-62	292	300	252	252	184	186	360	366	302	314	276	282	378	386	268	268	146	146	346	354	244	254	158	160
WD-1	0	0	0	0	0	0	0	0	288	310	0	0	0	0	0	0	150	150	0	0	246	248	152	152
WD-2	286	298	264	264	182	200	360	362	292	300	260	280	388	392	288	294	146	152	308	332	248	264	152	158
WD-3	294	300	248	276	198	212	360	368	296	300	270	290	388	392	276	280	146	152	344	354	252	256	158	168
WD-4	286	292	248	258	184	190	346	352	0	0	0	0	388	390	276	276	178	190	314	346	258	260	158	170
WD-5	292	292	260	272	184	190	364	396	292	294	274	278	380	382	272	276	146	146	316	330	248	266	158	164
WD-6	286	294	252	262	204	212	360	370	292	314	270	280	390	392	272	272	182	182	326	356	248	256	158	168
WD-7	300	304	272	272	192	200	342	356	300	314	280	282	378	388	272	278	190	190	322	324	250	258	158	162
WD-8	288	294	254	254	192	192	354	362	282	304	280	292	386	390	276	278	146	150	330	334	252	256	152	158
WD-9	292	298	268	268	184	216	356	368	282	302	274	280	388	390	276	288	188	188	346	348	244	248	156	172
WD-10	292	292	0	0	186	186	354	368	290	310	0	0	390	390	268	268	146	146	326	330	256	258	158	158
WD-11	296	300	258	276	190	190	356	360	282	290	278	292	388	392	272	278	178	178	352	364	254	256	152	158
WD-12	286	294	260	294	186	192	352	362	270	282	282	288	386	388	272	276	146	150	324	342	250	264	152	158
WD-13	292	292	230	292	0	0	356	372	292	296	260	278	388	390	272	278	184	184	304	322	250	252	152	158
WD-14	288	292	254	272	200	210	344	364	282	290	284	290	388	390	272	272	150	168	320	324	256	262	174	184
WD-15	284	292	252	262	184	190	350	368	282	298	270	282	388	388	276	278	176	176	346	352	254	258	152	158
WD-16	276	300	300	300	184	196	360	374	290	298	286	290	388	390	280	290	146	146	322	328	256	258	162	174
WD-17	300	306	264	300	0	0	342	354	296	298	274	288	376	380	280	280	146	150	328	348	254	258	152	158
WD-18	292	298	248	248	192	196	344	362	290	298	280	290	380	390	280	280	182	182	350	350	258	266	168	170
WD-19	292	296	266	274	0	0	362	374	288	320	274	290	390	392	284	290	146	146	304	320	244	258	164	172
WD-20	0	0	0	0	0	0	0	0	0	0	0	0	0	0	0	0	0	0	0	0	0	0	148	148
WD-21	292	296	0	0	184	186	362	368	282	290	280	280	386	390	280	284	168	178	302	304	250	262	158	172
WD-22	288	294	230	230	184	192	356	360	282	310	274	282	388	392	280	288	172	188	302	322	256	260	152	158
WD-23	300	300	248	262	182	200	362	368	288	294	274	282	380	392	272	274	146	146	302	308	248	250	152	158
WD-24	292	294	262	262	202	206	370	374	282	284	280	282	390	392	276	280	146	152	334	342	242	252	174	188
WD-25	294	296	260	262	0	0	344	360	294	300	274	284	386	388	280	282	188	188	320	330	248	258	152	158
WD-26	292	292	268	270	192	192	342	360	292	300	0	0	388	390	272	274	178	186	344	352	252	256	174	182
WD-27	292	292	0	0	0	0	350	364	290	302	288	292	390	396	288	288	168	176	330	330	242	246	152	158
WD-28	298	298	0	0	0	0	342	360	298	302	270	270	0	0	272	276	146	146	312	312	232	244	158	182
WD-29	292	296	262	268	186	200	356	368	282	290	278	294	380	390	272	294	146	170	308	322	252	258	152	158
WD-30	292	294	0	0	186	194	342	360	282	300	274	276	390	392	270	278	176	182	330	334	266	270	152	158
WD-31	288	292	258	260	192	200	362	368	294	306	282	286	388	390	272	278	188	194	302	328	252	266	158	162
WD-32	292	294	0	0	194	200	350	368	312	314	270	280	388	390	276	280	146	150	306	322	232	238	152	158
QLS-1	292	292	252	252	184	206	358	372	282	282	272	272	380	388	280	288	180	182	342	346	230	240	152	158
QLS-2	292	298	244	244	0	0	362	370	282	302	274	280	388	390	276	288	172	180	330	332	232	256	152	158
QLS-3	292	298	0	0	0	0	342	342	298	298	272	274	380	386	280	286	172	172	322	344	250	256	170	188
QLS-4	292	298	244	244	196	204	370	374	298	302	266	272	388	392	278	286	176	186	326	340	246	248	158	160
QLS-5	292	296	250	268	182	190	362	364	298	300	274	280	386	388	280	288	172	178	314	326	232	234	158	162
QLS-6	288	292	250	262	202	202	342	374	298	300	274	280	388	392	278	290	180	180	336	342	232	240	158	172
QLS-7	300	304	250	258	192	204	356	366	294	296	276	280	388	392	270	278	180	180	312	346	262	264	172	180
QLS-8	294	300	250	272	196	202	362	362	298	302	270	274	388	390	278	288	174	180	314	340	234	240	172	180
QLS-9	284	292	254	258	196	204	362	362	282	302	278	288	380	390	270	272	178	178	318	350	258	264	152	158
QLS-10	300	306	272	272	184	196	342	358	294	300	274	296	388	392	274	274	178	178	330	346	232	256	172	174
QLS-11	286	296	250	262	192	226	358	362	292	298	262	282	380	388	280	300	166	182	326	328	256	258	158	162
QLS-12	292	296	266	266	192	198	380	380	282	300	264	274	380	392	276	288	174	182	314	326	246	264	158	178
QLS-13	292	296	250	268	184	224	358	370	298	300	280	280	390	392	270	270	182	184	328	340	232	234	162	174
QLS-14	292	298	250	268	184	202	358	358	284	298	264	280	388	392	288	312	180	180	314	342	232	240	152	158
QLS-15	300	300	250	250	184	186	358	368	286	292	262	274	386	392	274	288	180	180	314	328	246	256	172	186
QLS-16	284	292	250	250	184	202	342	358	290	294	278	280	380	386	270	276	170	182	322	324	236	240	152	158
QLS-17	292	298	250	250	192	202	362	374	282	292	274	274	380	388	270	278	172	182	330	348	260	270	172	174
QLS-18	292	296	244	258	186	196	354	358	282	300	274	280	380	390	270	270	172	178	310	326	232	244	158	162
QLS-19	292	298	266	266	204	216	358	362	282	300	264	264	380	388	278	292	0	0	314	328	232	240	172	174
QLS-20	288	288	250	268	186	196	358	362	282	300	274	280	388	392	270	274	172	180	322	354	246	254	170	170
QLS-21	292	296	250	264	198	220	360	362	282	300	274	286	380	388	264	270	172	182	314	324	242	246	152	158
QLS-22	292	298	250	250	0	0	362	370	298	302	268	280	388	392	270	270	172	180	340	348	234	242	172	174
QLS-23	284	292	250	266	186	196	362	362	282	298	268	288	380	392	276	288	172	182	330	346	244	246	158	158
QLS-24	292	296	266	270	190	206	340	374	300	302	274	286	388	390	270	280	178	184	322	334	234	236	162	172
QLS-25	292	296	250	250	202	210	358	374	292	294	274	274	380	388	270	274	172	184	300	326	256	262	152	180
QLS-26	286	296	258	268	186	210	350	362	294	298	274	284	388	392	272	276	172	188	312	314	232	240	158	180
QLS-27	290	298	244	250	204	214	372	374	276	304	262	294	392	394	276	294	164	170	314	328	256	266	152	172
QLS-28	284	298	258	266	192	202	360	370	294	298	270	286	386	394	276	278	172	174	314	340	240	244	174	174
QLS-29	292	298	250	264	196	202	370	380	298	304	280	284	392	394	278	294	174	178	314	338	246	254	162	186
QLS-30	284	292	262	262	194	218	366	372	294	296	260	278	388	390	278	288	182	182	342	346	232	242	152	158
QLS-31	286	296	266	266	186	196	342	358	300	302	270	270	388	392	270	276	172	172	328	332	246	270	158	172
QLS-32	284	296	250	258	184	202	362	364	282	282	262	270	380	390	276	288	180	182	324	332	256	268	162	174
WJM-1	284	292	0	0	196	210	362	368	282	302	280	288	376	380	286	290	174	174	318	340	244	256	170	174
WJM-2	300	304	264	264	196	202	342	350	296	312	272	284	380	388	272	272	166	170	320	324	246	252	158	180
WJM-3	286	296	252	252	196	206	354	364	296	298	284	286	386	388	272	274	176	176	314	328	230	236	178	178
WJM-4	292	296	250	250	0	0	0	0	292	308	268	278	388	394	296	298	178	178	298	306	238	246	158	162
WJM-5	288	292	260	262	182	186	354	354	290	296	284	288	378	386	278	294	180	180	300	300	230	244	158	174
WJM-6	292	296	246	262	184	196	354	362	294	302	274	280	380	390	270	274	180	182	312	336	240	244	162	172
WJM-7	288	296	260	264	186	196	342	362	308	310	262	274	388	392	290	290	172	178	312	322	258	266	158	174
WJM-8	290	300	262	268	184	186	342	362	296	312	282	286	380	386	270	276	146	150	334	342	232	244	152	158
WJM-9	292	294	250	260	196	196	342	362	296	296	274	282	392	392	288	290	182	182	314	314	242	248	158	162
WJM-10	282	292	258	258	186	196	362	368	306	308	272	300	388	390	272	272	174	174	296	340	266	272	150	158
WJM-11	288	296	0	0	198	206	356	356	306	308	280	288	388	392	270	270	174	174	296	296	252	266	158	158
WJM-12	292	298	264	268	186	202	360	370	288	294	282	290	388	396	272	286	174	190	294	300	232	242	158	158
WJM-13	284	292	0	0	184	186	362	370	290	302	274	290	390	394	270	278	176	176	314	334	240	244	172	178
WJM-14	284	292	256	262	186	210	362	364	290	292	280	288	380	388	270	270	146	150	300	310	254	258	152	158
WJM-15	284	292	262	262	186	196	342	362	282	294	276	284	376	380	270	278	146	154	302	304	244	256	150	158
WJM-16	288	294	274	274	188	198	360	368	292	298	282	286	386	390	290	294	174	186	304	330	252	256	174	188
WJM-17	282	292	254	254	186	200	358	364	276	282	296	302	376	380	272	274	150	168	300	308	230	254	158	158
WJM-18	292	298	260	260	196	202	356	358	288	290	270	282	376	380	272	278	184	184	314	326	232	242	152	158
WJM-19	300	302	262	262	198	202	342	372	282	288	280	284	380	390	278	296	174	176	314	328	250	258	158	172
WJM-20	294	298	0	0	184	200	358	364	282	282	268	274	386	390	278	290	176	176	314	320	242	252	152	152
WJM-21	300	300	260	260	202	210	356	362	290	324	278	288	388	392	278	292	174	180	302	314	250	254	158	172
WJM-22	292	298	264	264	184	188	354	364	294	296	274	280	388	388	276	280	176	182	302	304	232	246	158	162
WJM-23	284	294	0	0	186	200	362	362	296	314	280	282	380	388	292	298	148	150	302	322	242	252	158	174
WJM-24	292	298	266	266	184	192	342	356	298	312	280	288	390	392	276	278	176	182	306	324	254	260	156	160
WJM-25	288	292	244	268	186	204	342	350	276	282	274	278	376	380	286	290	180	180	304	334	240	256	152	162
WJM-26	288	300	244	244	184	202	342	342	284	294	290	302	390	392	274	278	170	182	314	318	238	242	148	152
WJM-27	286	292	260	260	194	198	356	358	296	298	272	280	378	390	276	282	146	152	314	320	252	254	162	172
WJM-28	300	306	262	262	184	186	342	354	294	302	280	296	380	392	278	296	146	146	318	334	232	242	158	162
WJM-29	282	290	264	268	182	186	368	374	282	294	278	292	388	392	270	278	174	174	298	304	252	258	162	174
WJM-30	282	292	264	264	184	186	358	368	294	302	278	282	388	390	278	292	152	174	348	354	252	256	152	158
WJM-31	292	296	274	274	186	196	354	366	282	288	276	278	378	386	292	306	146	152	326	334	240	242	162	186
WJM-32	300	306	262	280	190	208	368	368	282	298	278	278	380	392	270	278	146	146	308	314	250	254	180	182
WJM-33	282	292	256	264	184	186	364	364	282	290	280	282	380	392	270	278	146	152	314	318	244	250	158	172
WJM-34	282	292	260	262	184	186	370	372	298	304	282	292	390	392	278	292	146	152	308	334	244	250	158	162
WJM-35	292	298	252	260	186	196	358	360	296	302	274	278	376	380	280	280	168	182	318	328	232	240	158	162
WJM-36	296	300	268	268	184	200	362	372	282	298	280	280	382	386	278	282	178	178	314	336	254	262	152	158
TST-1	292	296	240	240	184	186	372	374	294	296	280	280	388	392	276	278	180	180	302	314	258	268	152	158
TST-2	286	296	268	276	196	206	364	364	294	296	272	288	380	386	286	292	170	178	326	330	248	262	158	158
TST-3	288	296	0	0	184	204	342	372	296	296	280	290	376	380	278	288	152	152	332	342	266	278	150	156
TST-4	288	296	240	240	184	200	342	372	294	298	282	290	376	380	278	290	178	180	304	304	258	262	158	162
TST-5	288	296	240	270	186	202	366	370	288	294	274	280	376	378	286	292	146	152	314	348	248	258	158	160
TST-6	292	296	252	252	184	196	362	362	298	304	280	292	390	392	276	288	182	204	314	324	258	268	158	174
TST-7	278	296	262	268	202	206	362	368	296	302	262	274	386	388	286	292	182	184	314	316	242	244	158	162
TST-8	282	292	240	264	184	186	358	372	276	282	262	264	386	388	286	288	170	178	314	318	254	262	158	172
TST-9	292	296	244	246	184	204	362	370	292	302	272	280	374	378	276	286	170	202	314	334	240	242	158	162
TST-10	286	300	0	0	184	190	362	372	302	302	262	272	380	388	272	282	170	170	314	334	266	268	190	190
TST-11	292	298	260	260	186	200	342	352	288	298	280	298	386	388	276	278	146	152	314	320	244	258	170	170
TST-12	292	296	240	240	184	186	360	366	282	294	266	274	386	390	278	286	178	180	318	348	262	276	158	162
TST-13	284	294	240	260	196	216	342	362	290	294	280	282	380	386	276	278	178	182	314	318	258	262	158	162
TST-14	300	306	268	268	186	204	342	362	292	300	280	290	388	392	278	288	146	150	334	346	266	268	158	162
TST-15	292	296	0	0	184	198	360	362	286	298	280	284	376	380	272	276	148	150	314	318	0	0	188	188
TST-16	292	298	250	260	186	206	358	372	288	310	290	292	378	390	280	292	182	182	306	320	262	266	188	188
TST-17	284	294	0	0	196	202	354	360	294	308	288	300	388	392	280	288	170	170	304	342	264	276	174	188
TST-18	286	298	264	264	184	196	362	362	294	298	278	290	386	392	278	294	146	150	308	322	264	270	174	188
TST-19	284	292	262	262	184	186	342	342	296	302	280	292	380	390	272	278	188	194	312	350	276	282	172	172
TST-20	286	298	272	272	196	206	362	362	294	298	278	292	386	392	278	294	146	150	322	324	264	270	174	188
TST-21	292	292	264	264	188	198	360	372	288	300	274	276	380	386	280	286	180	180	316	318	242	244	152	160
TST-22	286	292	262	262	184	196	354	358	288	300	290	294	380	388	280	280	172	172	318	324	244	264	158	158
TST-23	300	300	266	268	192	200	362	368	292	282	290	298	388	390	280	288	180	186	318	340	254	258	158	158
TST-24	292	296	264	264	174	184	364	364	300	306	272	286	380	388	276	288	188	188	334	350	238	266	158	162
TST-25	292	298	270	270	202	208	342	342	296	308	274	280	380	388	272	278	146	148	322	328	240	244	158	160
TST-26	292	296	0	0	184	198	360	364	294	298	272	280	374	378	276	278	182	188	314	316	266	268	160	162
TST-27	278	286	274	274	184	190	372	372	296	302	278	294	390	390	280	280	184	184	298	304	240	260	158	162
TST-28	286	298	274	274	188	190	370	370	298	310	274	276	380	392	280	280	170	172	304	308	254	264	158	158
TST-29	288	298	0	0	190	206	358	372	304	320	276	282	390	390	274	280	186	186	312	326	260	270	158	162
TST-30	294	298	264	268	184	206	360	368	294	298	270	280	388	390	286	290	170	178	344	348	240	244	158	162
